# Supplementary material for: Does the degree of substitution on the cyclodextrin hosts impact their affinity towards guest binding?
Source: Royal Society of Chemistry journal article supplement (doi:10.1039/d0pp00103a), 2020-05-13
Supplement: d0pp00103a1.pdf [file d0pp00103a1.pdf]

## Supporting Information

### Does degree of substitution on the cyclodextrin hosts impacts on their affinity towards guest binding?

Goutam Chakraborty<sup>a</sup>, Alok K. Ray<sup>a,b</sup>, Prabhat K. Singh<sup>b,c\*</sup> and Haridas Pal<sup>b\*</sup>

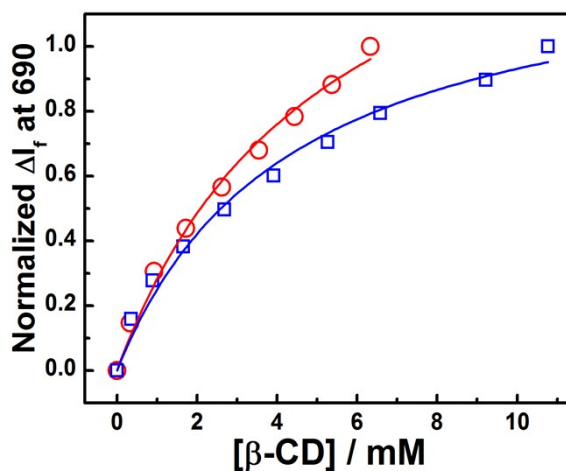

**Figure S1:** Binding isotherm of 3.5 μM LDS-798 with βCD in the absence of 1M NaCl (red circle) and in the presence of 1M NaCl (blue square) using 1:1 binding model.

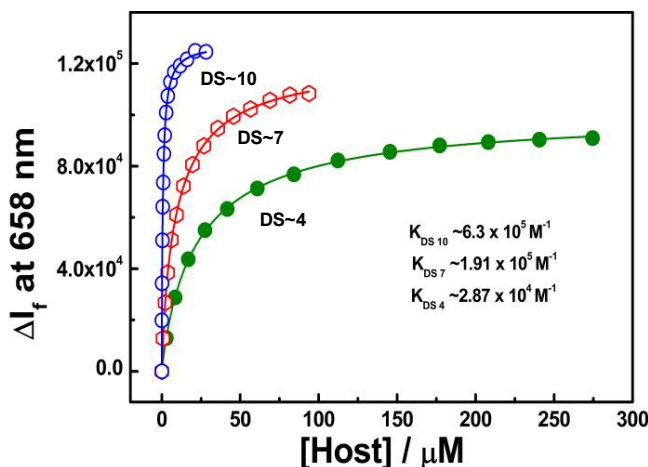

**Figure S2:** Binding isotherm of 1.5 μM LDS-722 with different host pH ~7, at 25 °C.

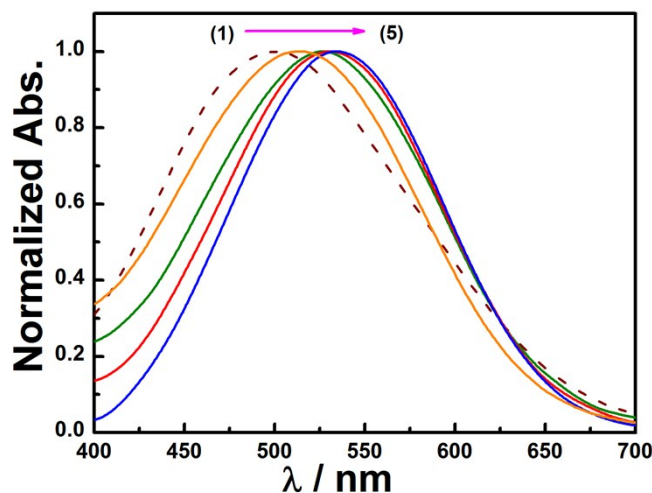

**Figure S3:** Normalized absorption spectra of (1) LDS-798 [ $\lambda_{\text{max}} = 500 \text{ nm}$ ] and LDS-798-cyclodextrin complexes under saturation condition; (2)  $\beta$ -CD [6.3 mM,  $\lambda_{\text{max}} = 513 \text{ nm}$ ], (3) DS~4 [200  $\mu\text{M}$ ,  $\lambda_{\text{max}} = 527 \text{ nm}$ ], (4) DS~7 [100  $\mu\text{M}$ ,  $\lambda_{\text{max}} = 530 \text{ nm}$ ] and (5) DS~10 [26  $\mu\text{M}$ ,  $\lambda_{\text{max}} = 534 \text{ nm}$ ]. [LDS-798 concentration used 3.5  $\mu\text{M}$ , Temperature 25  $^{\circ}\text{C}$ , pH  $\sim$ 7]

**Table S1. Quantum yield of different LDS-798-SBE<sub>n</sub> $\beta$ CD complexes.**

| Species                              | Quantum Yield <sup>s</sup> |
|--------------------------------------|----------------------------|
| LDS-798                              | 0.002                      |
| LDS-798- $\beta$ CD                  | 0.012                      |
| LDS-798-SBE <sub>4</sub> $\beta$ CD  | 0.029                      |
| LDS-798-SBE <sub>7</sub> $\beta$ CD  | 0.034                      |
| LDS-798-SBE <sub>10</sub> $\beta$ CD | 0.056                      |

<sup>s</sup>Fluorescence quantum yield for LDS-798 was obtained from the literature.<sup>1</sup> The quantum yield values for the dye-host systems were estimated using the integrated area under the emission curve at saturated concentration of their respective binding isotherms, following comparison method.<sup>2</sup>

**Table S2. Binding constant values for different LDS-722-SBE<sub>n</sub> $\beta$ CD complexes.**

| Complex                              | Binding constant ( $K_b$ ) in $\text{M}^{-1}$ |
|--------------------------------------|-----------------------------------------------|
| LDS-722-SBE <sub>4</sub> $\beta$ CD  | $2.87 \times 10^4$                            |
| LDS-722-SBE <sub>7</sub> $\beta$ CD  | $1.91 \times 10^5$                            |
| LDS-722-SBE <sub>10</sub> $\beta$ CD | $6.3 \times 10^5$                             |

**Table S3. Quantum yield of different LDS-722-SBE<sub>n</sub>βCD complexes.**

| Species                       | Quantum Yield <sup>§</sup> |
|-------------------------------|----------------------------|
| LDS-722                       | 0.01                       |
| LDS-722-SBE <sub>4</sub> βCD  | 0.066                      |
| LDS-722-SBE <sub>7</sub> βCD  | 0.073                      |
| LDS-722-SBE <sub>10</sub> βCD | 0.080                      |

<sup>§</sup>Fluorescence quantum yield for LDS-798 was obtained from the literature<sup>3</sup> The quantum yield values for the dye-host systems were estimated using the integrated area under the emission curve at saturated concentration of their respective binding isotherms, following comparison method.<sup>2</sup>

## References

1. Sarkar, P.; Luchowski, R.; Raut, S.; Sabnis, N.; Remaley, A.; Lacko, A. G.; Thamake, S.; Gryczynski, Z.; Gryczynski, I. Studies on solvatochromic properties of aminophenylstyryl-quinolinium dye, LDS 798, and its application in studying submicron lipid based structure. *Biophys. Chem.* **2010**, *153*, 61–69.
2. Lakowicz, J. R. Principles of Fluorescence Spectroscopy. 3rd Edition, Plenum Press, Springer, New York **2006**.
3. Sola-Llano, R.; Martínez-Martínez, V.; Fujita, Y.; Gómez-Hortigüela, L.; Alfayate, A.; Uji-i, H.; Fron, E.; Pérez-Pariente, J.; López-Arbeloa, I. Formation of a Nonlinear Optical Host–Guest Hybrid Material by Tight Confinement of LDS 722 into Aluminophosphate 1D Nanochannels. *Chem. Euro. J.* **2016**, *22*, 15700-15711.
